# Supplementary material
Source: publisher figshare collection journal article supplement (https://frontiersin.figshare.com/ndownloader/files/17199092)
Supplement: Supplementary file [file 17199092]

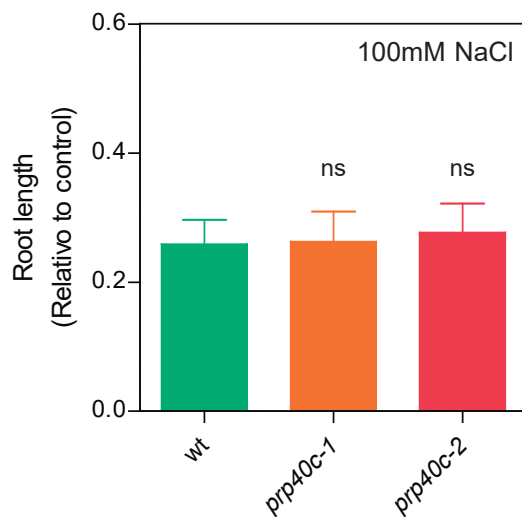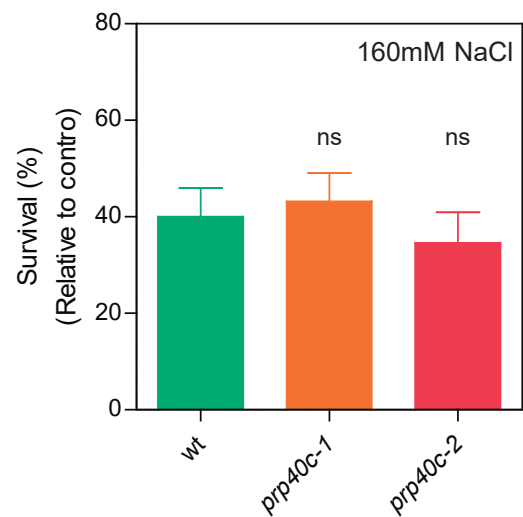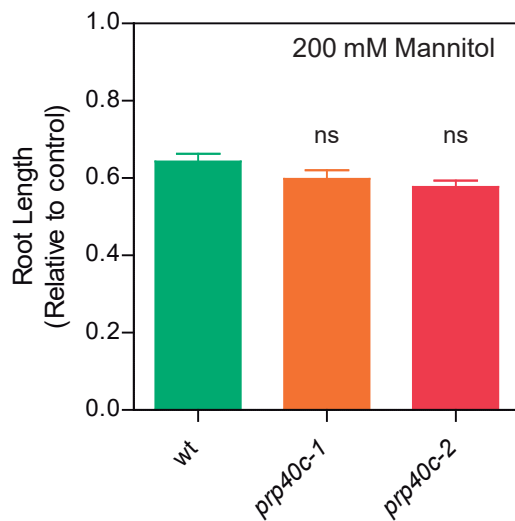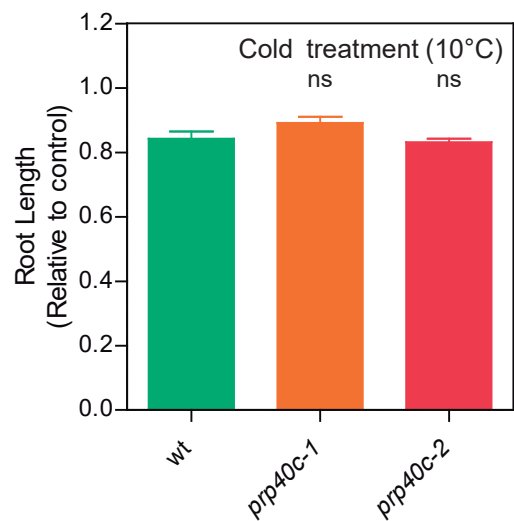

**Supplementary Figure S5.** *prp40c* mutants do not display susceptibility to salt stress at the vegetative growth stage. Salt tolerance was assessed through the analysis of survival rate of 14 days-old plants growth in regular MS medium or in MS containing 160mM NaCl. Comparison of root growth on MS medium with 100 mM NaCl, 200 mM Mannitol and cold treatment (10°C). Root growth was measured relative to control plants. Error bars indicate SEM. Student's t-Test was performed between mutants and wild-type (ns: not significant).
